# Supplementary material for: Preparation of low-toxic cadmium selenide nanoparticles using the plant extract: A comparative study on the extraction techniques, characterization, biological potentials
Source: Research Square preprint supplement (doi:10.21203/rs.3.rs-191407/v1), 2021-02-25
Supplement: Supplementary file 1 [file da4737a23b7c62f2a8c049f0.docx]

Inhibition (%) = [(A0 - A1)/A0] ×100 (Eq.1)

MI= (Eq.2)
